# Supplementary material
Source: PubMed Central journal article supplement (PMC5823511)
Supplement: NIHMS942796-supplement-Figure_S1__Flow_diagram_for_cohort_selection_.pdf [file NIHMS942796-supplement-Figure_S1__Flow_diagram_for_cohort_selection_.pdf]

Total Hospitalizations  
1/2013-12/2013  
(n = 35,580,348)

Non-Parathyroidectomy  
admissions (n = 35,570,985)

Parathyroidectomy Procedure  
Hospitalizations  
(n = 9,363)

Parathyroidectomy  
Hospitalization without CKD  
(n = 6,364)

Parathyroidectomy in Patients with  
CKD  
(n = 2999)

Other Exclusions  
(n = 230)

Index Admissions with CKD  
(n = 2756)
